# Supplementary material for: A journey from calix[4]arene to calix[6] and calix[8]arene reveals more than a matter of size. Receptor concentration affects the stability and stoichiometric nature of the complexes
Source: Royal Society of Chemistry journal article supplement (doi:10.1039/c7cp01889d), 2017-01-01
Supplement: c7cp01889d1.pdf [file c7cp01889d1.pdf]

**A journey from calix[4]arene to calix[6] and calix[8]arene reveals more than a matter of size. Receptor concentration affects stability and stoichiometric nature of the complexes.**

Nitin Lavande, Angel Acuña, Nuno Basilio, \* Vitor Francisco, Dipalee D. Malkhede, Luis Garcia-Rio\*

---

**Supporting Information**

---

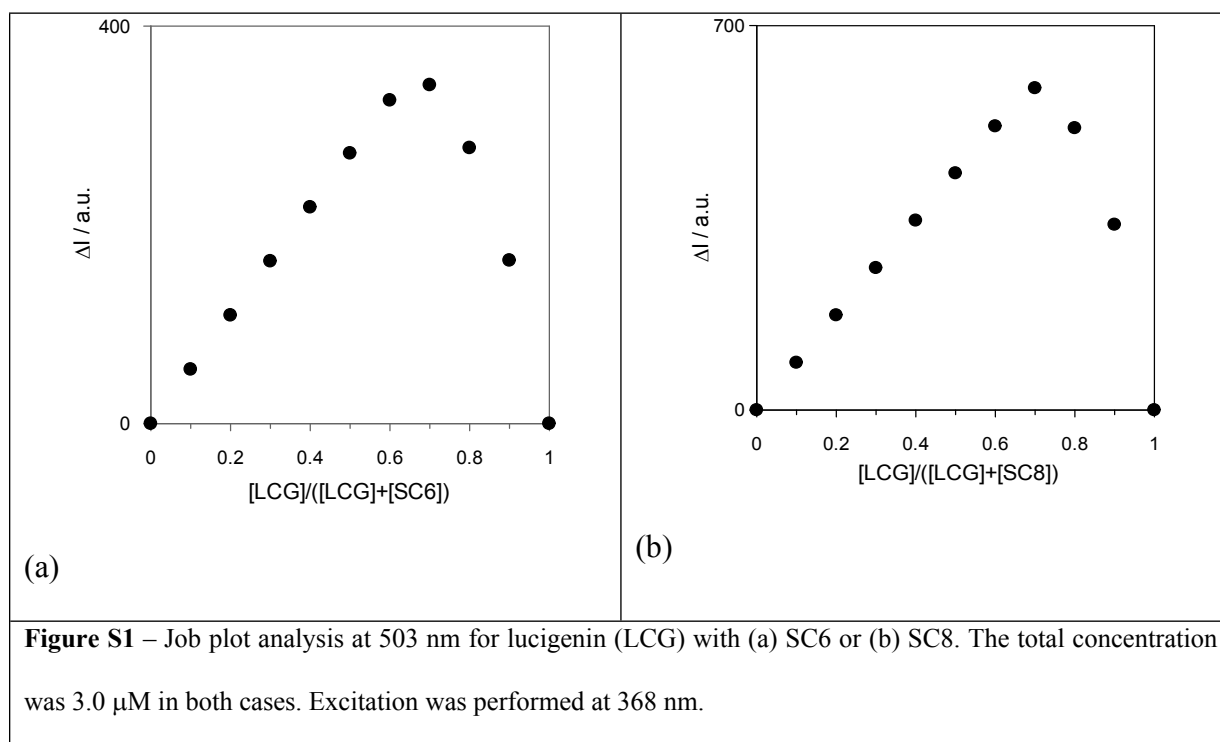

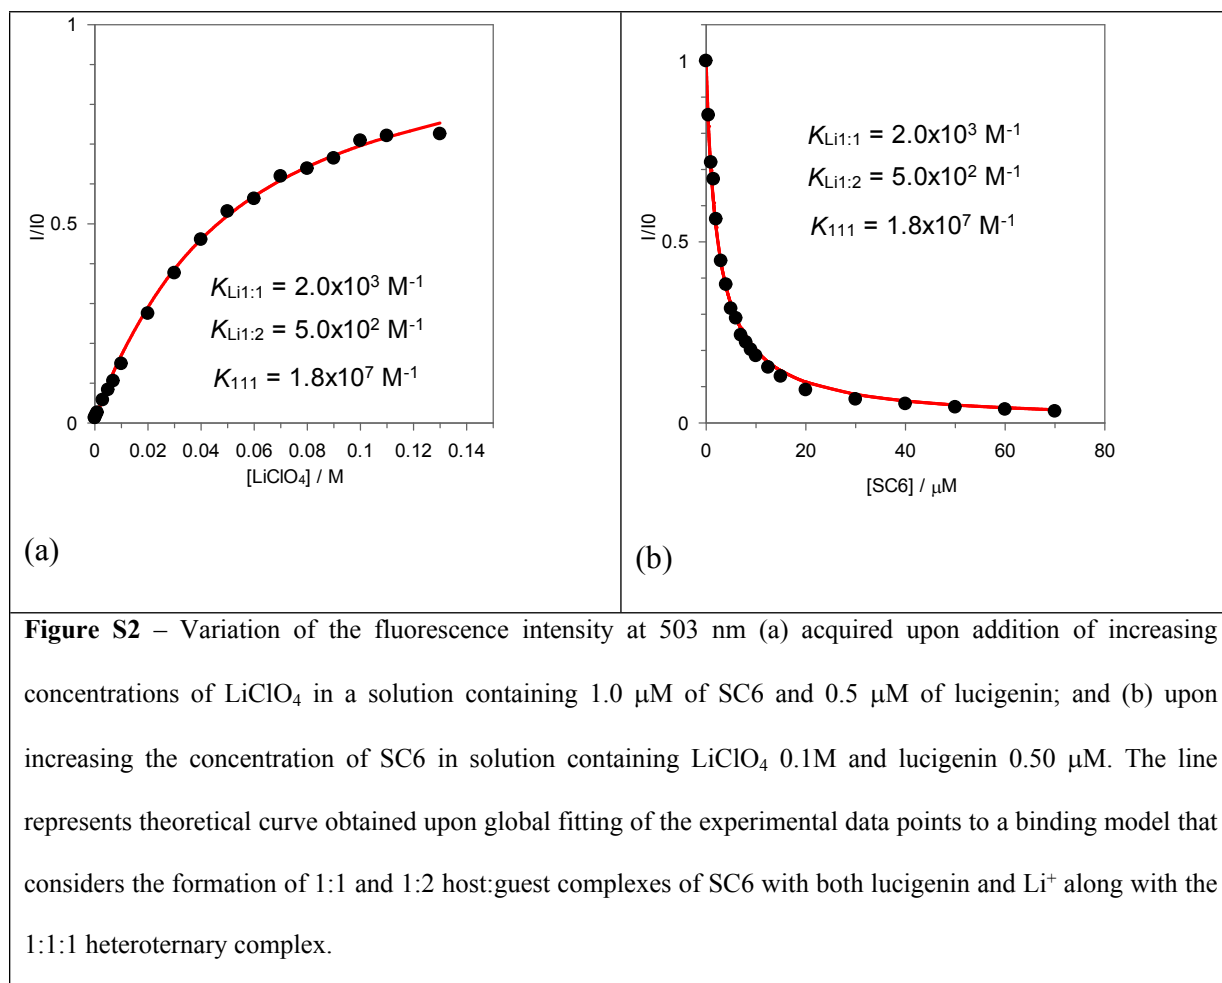

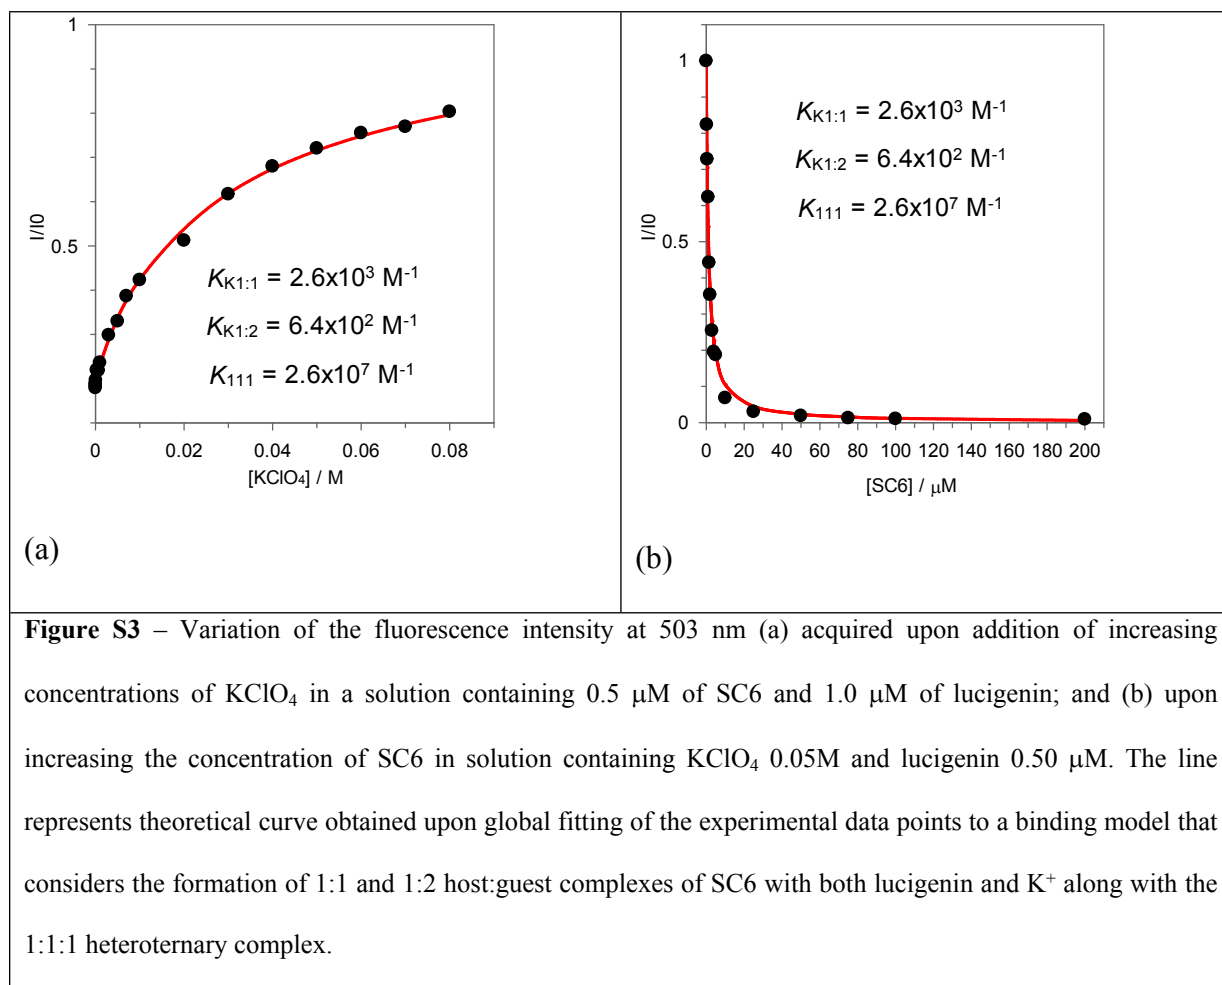

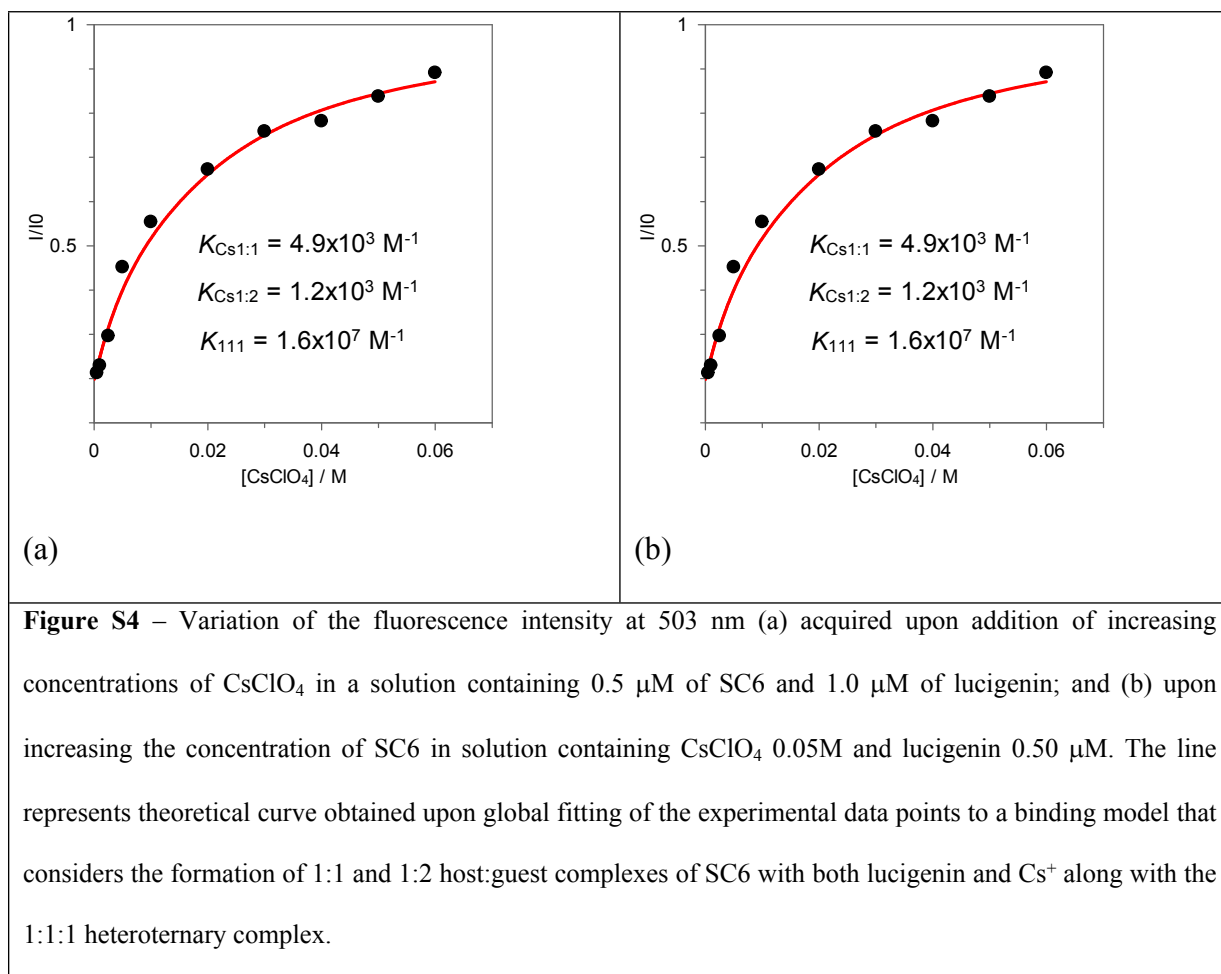

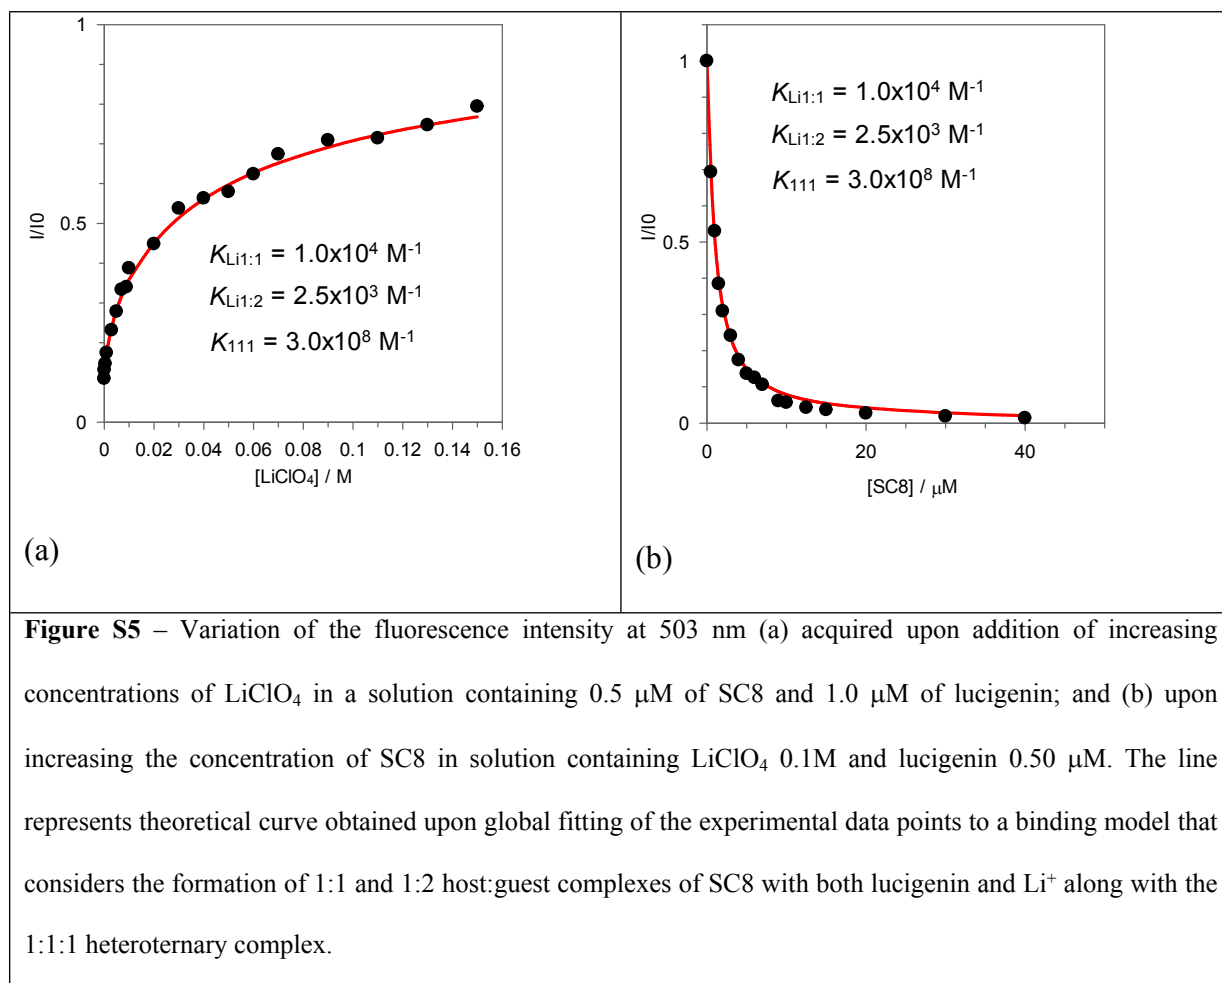

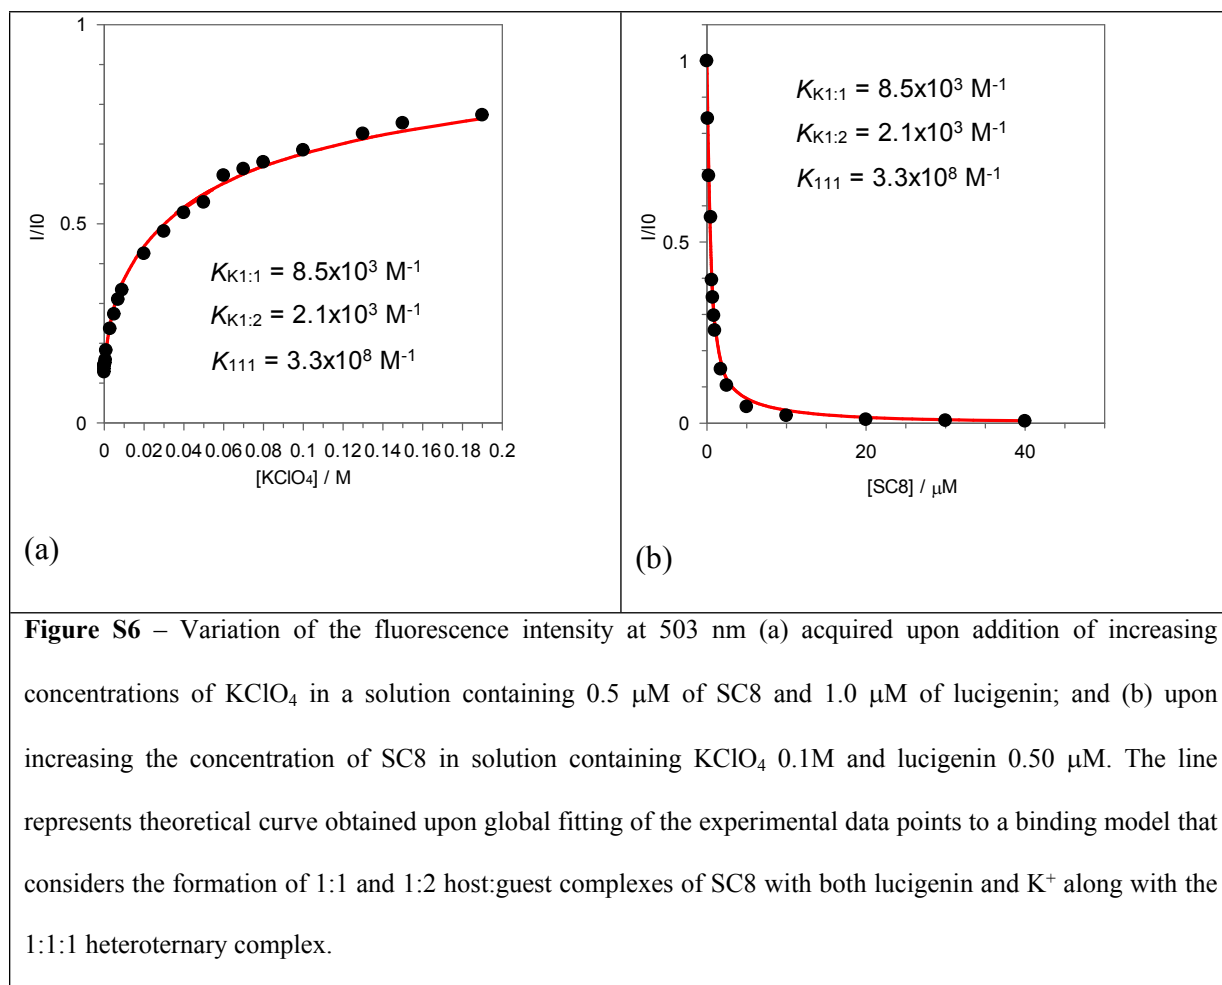

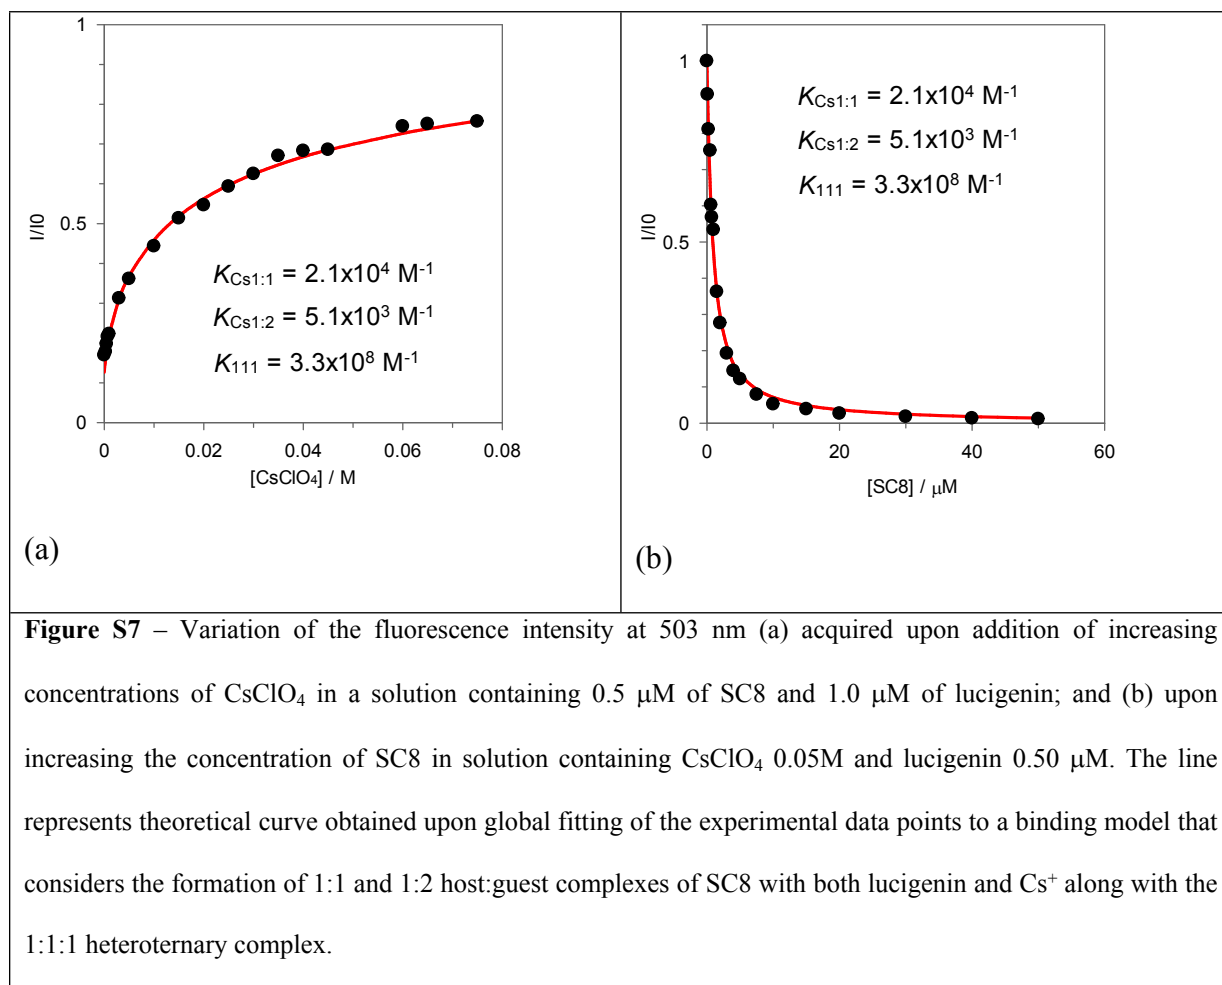

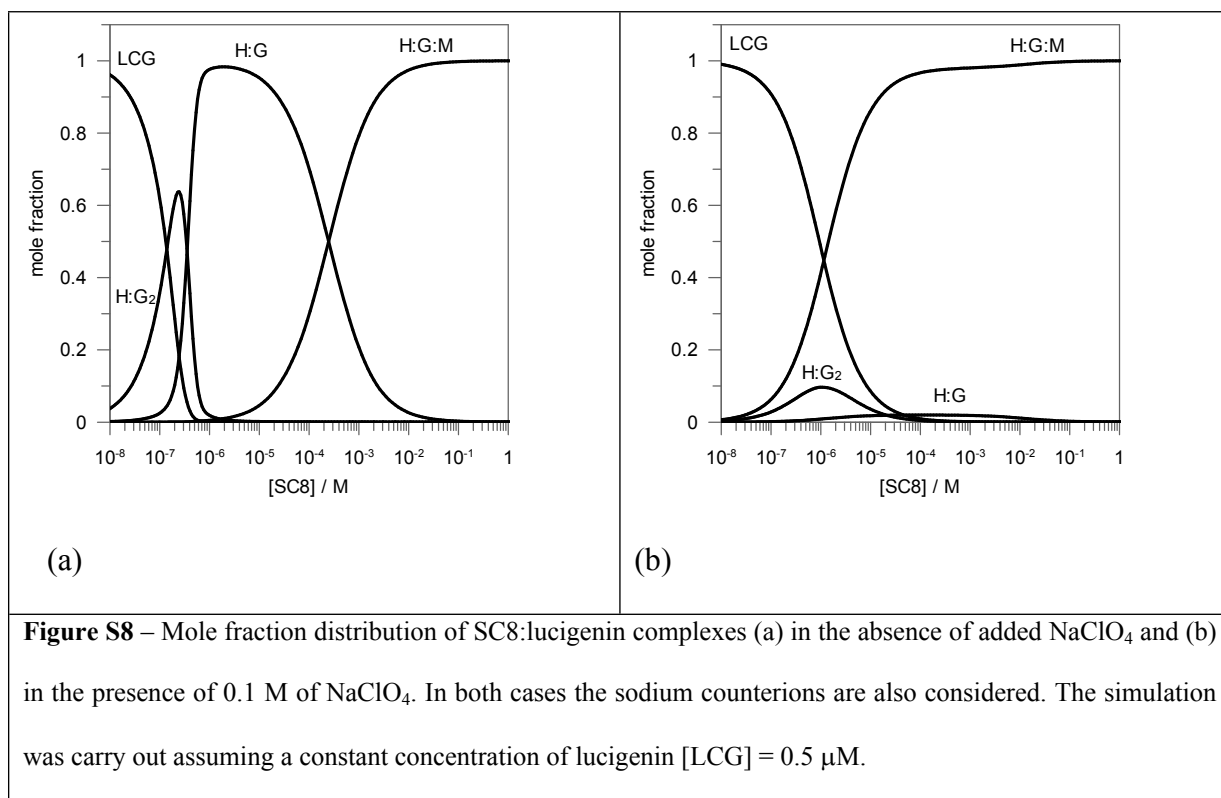



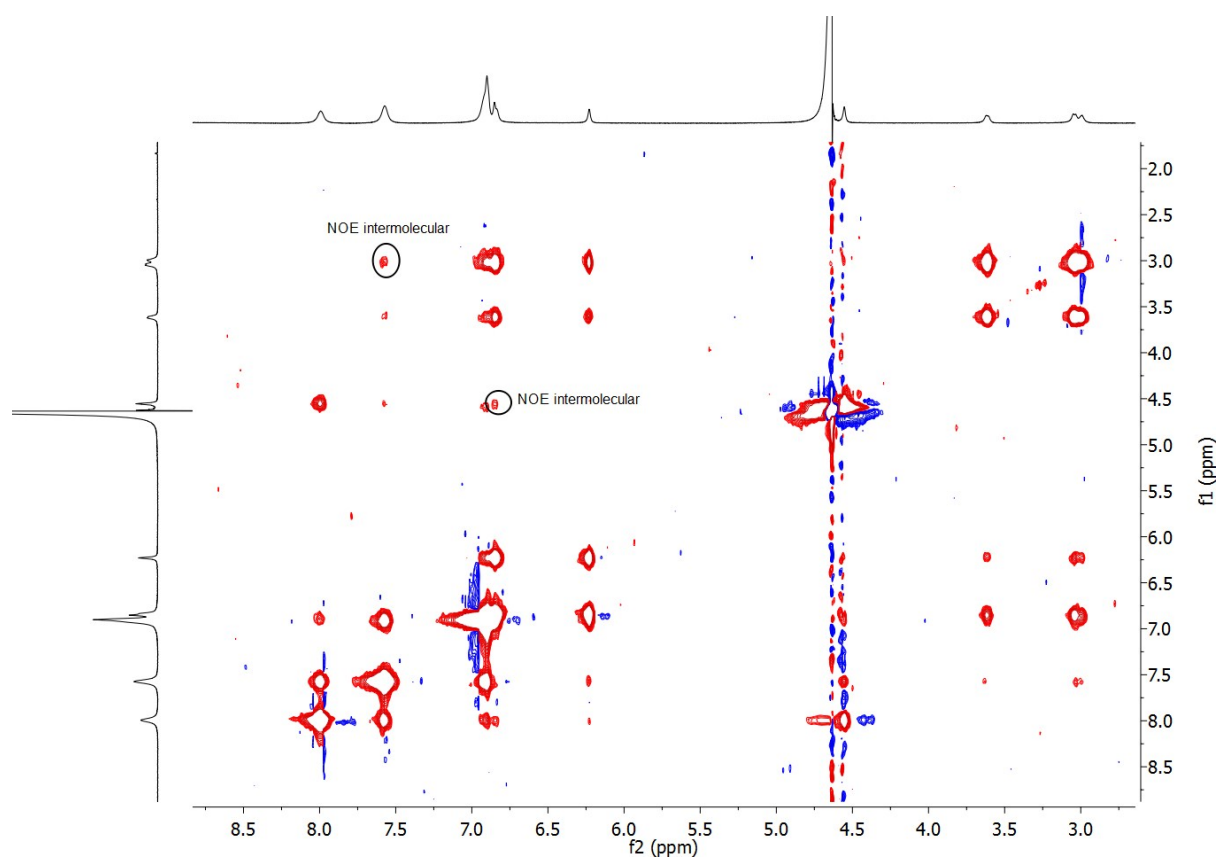

**Figure S9** – NOESY spectrum obtained for a solution of lucigenin 1.37 mM with SC6 0.4 mM in D<sub>2</sub>O at 5°C. Mixing time 400 ms..
